# Supplementary material
Source: PubMed Central journal article supplement (PMC3675854)
Supplement: CJN.10051012_CJN10051012SupplementaryData.pdf [file CJN.10051012_CJN10051012SupplementaryData.pdf]

**Supplementary Table 1. Detailed characteristics of the 29 HIV-infected patients with Tubulopathy**

| N° | Age<br>Gender | Race | CD4 <sup>+</sup><br>count | HIV VL             | AIDS | ARV exposure                    | HTN | Peak<br>sCr | eGFR | RIFLE   | RRT | P <sub>u</sub> /C <sub>u</sub> | Hu | Lu | PTD   | NDI | ATN | Mechanism of tubular<br>injury | Main<br>Etiology                 | Specific<br>Treatment       | Renal Function<br>at Last Follow-up<br>(SCr, M <sub>x</sub> ) |
|----|---------------|------|---------------------------|--------------------|------|---------------------------------|-----|-------------|------|---------|-----|--------------------------------|----|----|-------|-----|-----|--------------------------------|----------------------------------|-----------------------------|---------------------------------------------------------------|
| 1  | 34/M          | B    | 116                       | NA                 | -    | TDF/DVR/RTV                     | -   | 1.77        | 44   | AKI     | -   | 486                            | -  | -  | +     | -   | -   | Drug/Toxic                     | TDF                              | TDF withdrawal              | NA                                                            |
| 2  | 53/M          | H    | 168                       | 8x10 <sup>4</sup>  | -    | TDF/ATZ/ddI/<br>3TC/RTV         | -   | 0.85        | 94   | NRF     | -   | <442                           | -  | -  | +     | -   | -   | Drug/Toxic                     | TDF                              | NA                          | NA                                                            |
| 3  | 39/M          | C    | 450                       | 2x10 <sup>5</sup>  | +    | TDF/ATZ/3TC/<br>RTV             | -   | 1.39        | 57   | Risk    | -   | <442                           | -  | -  | +/-FS | -   | -   | Drug/Toxic                     | TDF                              | TDF withdrawal              | CR<br>(0,90 mg/dl, M73)                                       |
| 4  | 61/M          | C    | 270                       | <500               | -    | TDF/ATZ/ABC/<br>RTV/EFV/SQV     | +   | 1.56        | 48   | Risk    | -   | 1768                           | -  | -  | +     | -   | -   | Drug/Toxic                     | TDF                              | TDF withdrawal              | NA                                                            |
| 5  | 42/M          | C    | 441                       | <40                | +    | TDF/RTV//3TC/<br>d4T/DVR        | NA  | 1.19        | 71   | NRF     | -   | 963                            | -  | -  | +     | +   | -   | Drug/Toxic                     | TDF                              | TDF withdrawal              | CR<br>(1.02 mg/dl, M37)                                       |
| 6  | 46/M          | C    | 657                       | <40                | +    | TDF/RTV/ATZ/<br>ABC/3TC/IDV     | -   | 1.58        | 47   | AKI/CKD | -   | 1060                           | -  | -  | +/-FS | -   | -   | Drug/Toxic                     | TDF                              | Adjunction of<br>Probenecid | Stable-CKD<br>(1.66mg/dl, M7)                                 |
| 7  | 53/M          | C    | <10                       | <40                | +    | TDF/3TC/RTV/<br>FOS-APV         | NA  | 1.80        | 40   | AKF     | -   | 1573                           | -  | +  | +/-FS | -   | -   | Drug/Toxic                     | TDF                              | TDF withdrawal              | Worsening-CKD<br>(3.19 mg/dl, M2)                             |
| 8  | 51/F          | B    | 108                       | 472                | -    | TDF/3TC/AZT/<br>EFV/d4T/ABC     | -   | 0.85        | 91   | Risk    | -   | 2722                           | -  | -  | +     | -   | -   | Drug/Toxic                     | TDF                              | TDF withdrawal              | CR<br>(0.61mg/dl, M55)                                        |
| 9  | 44/F          | C    | ND                        | NA                 | +    | TDF/ddI/RTV/<br>LOP             | -   | 2.15        | 25   | AKI     | -   | 1326                           | -  | -  | +/-FS | +   | -   | Drug/Toxic                     | TDF                              | TDF withdrawal              | PR<br>(1.36 mg/dl, M3)                                        |
| 10 | 53/M          | C    | 501                       | <40                | -    | TDF/RTV/FOS-<br>APV/<br>ABC/3TC | -   | 1.40        | 53   | CKD     | -   | 1891                           | NA | NA | +     | -   | -   | Drug/Toxic                     | TDF                              | TDF withdrawal              | CR<br>(1.10 mg/dl, M8)                                        |
| 11 | 63/F          | C    | 193                       | 467                | +    | TDF/ATZ/3TC/<br>RTV             | -   | 1.66        | 31   | AKI     | -   | 8318                           | -  | NA | +/-FS | -   | -   | Drug/Toxic                     | TDF                              | TDF withdrawal              | PR<br>(1.29 mg/dl, M3)                                        |
| 12 | 36/M          | C    | 2                         | >5x10 <sup>5</sup> | +    | TDF/AZT/3TC/<br>ABC/RTV/LOP     | +   | 7.38        | 9    | AKF     | +   | <442                           | -  | -  | -     | -   | +   | Drug/Toxic                     | TDF                              | TDF withdrawal              | CR<br>(0.85mg/dl, M60)                                        |
| 13 | 57/M          | C    | 729                       | <40                | +    | TDF/ATZ/FTC/R<br>TV             | -   | 4.65        | 14   | AKI/CKD | -   | NA                             | +  | NA | -     | -   | +   | Drug/Toxic                     | TDF                              | TDF withdrawal              | PR-CKD<br>(2.87 mg/dl, M9)                                    |
| 14 | 56/M          | C    | 194                       | <40                | -    | TDF/ATZ/RTV                     | -   | 16.33       | 3    | AKF/CKD | +   | 1812                           | NA | NA | +     | -   | +   | Drug/Toxic                     | TDF<br>(+Dehydration)            | TDF withdrawal              | PR-CKD<br>(1.39mg/dl, M9)<br>(Dialysis free)                  |
| 15 | 46/M          | C    | 565                       | <40                | -    | TDF/RTV/LOP                     | -   | 12.78       | 3    | AKF     | +   | 1688                           | NA | NA | +     | -   | +   | Drug/Toxic                     | TDF<br>(+NSAIDs)                 | TDF + NSAIDs<br>withdrawal  | PR-CKD<br>(1.67 mg/dl, M15)<br>(Dialysis free)                |
| 16 | 48/F          | C    | 170                       | <40                | +    | TDF/3TC/RTV/<br>ABC/RTG/DVR     | -   | 3.18        | 16   | AKI/CKD | -   | 3023                           | -  | -  | +/-FS | -   | +   | Drug/Toxic                     | TDF<br>(+NSAIDs<br>+Dehydration) | TDF + NSAIDs<br>withdrawal  | PR-CKD<br>(1.72 mg/dl, M12)                                   |
| 17 | 38/M          | C    | 95                        | 5x10 <sup>4</sup>  | +    | ddI/3TC/RTV/<br>LOP             | -   | 3.72        | 21   | AKF     | -   | 1326                           | -  | -  | +     | +   | -   | Drug/Toxic                     | ddI                              | ddI withdrawal              | NA                                                            |
| 18 | 32/M          | B    | 5                         | <40                | +    | TDF/AZT/3TC/<br>NFV             | NA  | 11.76       | 5    | AKF/CKD | +   | 5038                           | +  | -  | +     | -   | -   | Drug/Toxic                     | CDF<br>(+TDF)                    | CDF withdrawal              | ESRD-LTD<br>(M18)                                             |

|    |      |   |     |                    |   |                     |    |       |    |         |   |       |    |    |       |   |   |                              |                                             |                            |                           |
|----|------|---|-----|--------------------|---|---------------------|----|-------|----|---------|---|-------|----|----|-------|---|---|------------------------------|---------------------------------------------|----------------------------|---------------------------|
| 19 | 33/M | C | 10  | >10 <sup>5</sup>   | + | RTV/ABC/3TC         | -  | 4.90  | 14 | AKF     | - | 1944  | -  | -  | +     | - | + | Drug/Toxic                   | CDF                                         | CDF withdrawal             | ESRD-LTD (M7)             |
| 20 | 85/F | C | 352 | <40                | - | TDF/RTV/DVR         | -  | 9.61  | 4  | AKF     | + | 13260 | NA | NA | +     | - | + | Drug/Toxic                   | Metformin-associated lactic acidosis (+TDF) | Metformin + TDF withdrawal | ESRD-LTD (M8)             |
| 21 | 43/M | C | 30  | 220                | + | AZT/3TC/RTV/LOP     | NA | 2.71  | 26 | AKF     | - | NA    | -  | -  | -     | - | + | Drug/Toxic                   | Vancomycin                                  | Drug withdrawal            | CR (0.99mg/dl, M86)       |
| 22 | 54/M | C | 64  | >5x10 <sup>4</sup> | + | -                   | +  | 4.47  | 14 | AKF     | - | 972   | -  | -  | -     | - | + | Drug/Toxic                   | Rifampicin (+IoCM)                          | Drug withdrawal            | PR-CKD (1.33 mg/dl, M132) |
| 23 | 43/M | B | 2   | 1x10 <sup>7</sup>  | + | RTV/ABC/3TC/DVR     | -  | 2.60  | 35 | AKI     | - | 698   | -  | NA | -     | - | + | Drug/Toxic                   | Amphotericin B                              | Drug withdrawal            | PR (2.26mg/dl, M1)        |
| 24 | 43/M | C | 600 | <40                | - | TDF/IDV/RTV/LOP/ddI | +  | 11.50 | 5  | AKF     | + | 3474  | -  | -  | +     | - | - | Mixt (Ischemic + Drug/Toxic) | Sepsis shock (+TDF)                         | ATB + TDF withdrawal       | PR-CKD (1.60 μmol/l, M6)  |
| 25 | 23/F | B | 37  | 200                | + | TDF/ATZ/ABC/RTV     | -  | 1.81  | 45 | AKI     | - | NA    | +  | -  | + /FS | - | + | Mixt (Ischemic + Drug/Toxic) | Sepsis shock (+TDF)                         | ATB                        | Death (<M1)               |
| 26 | 35/M | C | 220 | 8000               | + | IDV/3TC/AZT/RTV     | -  | 7.66  | 8  | AKF     | + | <442  | +  | +  | -     | - | + | Ischemic                     | Sepsis shock                                | ATB                        | Death (<M1)               |
| 27 | 50/M | C | 1   | 6200               | + | -                   | +  | 11.23 | 5  | AKF/CKD | + | NA    | -  | -  | -     | - | + | Ischemic                     | Sepsis                                      | ATB                        | Death (<M1)               |
| 28 | 44/M | C | 63  | 4800               | + | IDV/3TC/d4T         | +  | 13.16 | 3  | AKF     | + | NA    | +  | -  | -     | - | + | Other                        | Myeloma cast nephropathy (+IoCA +NSAIDs)    | Chemotherapy               | Death (<M1)               |
| 29 | 36/F | B | 170 | <40                | + | TDF/RTV/LOP         | -  | 2.18  | 27 | AKI     | - | 2652  | -  | -  | +     | - | - | Other                        | Undetermined                                | NA                         | PR (1.53 mg/dl, M5)       |

NA, not available; M, male; F, female; B, Black; H, Hispanic; C, Caucasian; VL (copies/mL), viral load; AIDS, acquired immunodeficiency syndrome; ARV, antiretroviral; TDF, tenofovir; DVR, darunavir; RTV, ritonavir; ATZ, atazanavir; ddi, didanosine; 3TC, lamivudine; LPV, lopinavir; ABC, abacavir; EFV, efavirenz; SQV, saquinavir; IDV, indinavir; FOS-APV, fosamprenavir; d4T, stavudine; AZT, zidovudine; NfV, nelfinavir; RTG, raltegravir; FTC, emtricitabine; HTN, hypertension; sCr (mg/dl), serum Creatinine; eGFR (ml/min/1.73m<sup>2</sup>), estimated Glomerular Filtration Rate; AKI, acute kidney injury; AKF, acute kidney failure; CKD, chronic kidney disease; RRT, renal replacement therapy; P<sub>u</sub>/C<sub>u</sub> (mg/g), proteinuria-to-creatinuria ratio; Hu, hematuria; Lu, leukocyturia; PTD proximal tubular dysfunction; FS, overt Fanconi's syndrome; NDI, nephrogenic diabetes insipidus; ATN, acute tubular necrosis; CDF, Cidofovir; NSAIDs, non-steroidal anti-inflammatory drugs; IoCM, iodinated contrast media; ATB, antibiotherapy; CR, complete recovery; PR, partial recovery; ESRD-LTD, end-stage renal disease with long-term dialysis; M<sub>x</sub>, months.

**Supplementary Table 2. Detailed characteristics of the 30 HIV-infected patients with Interstitial Nephritis**

| N°                                              | Age<br>Gender | Race | CD4<br>count | HIV VL              | AIDS | ARV<br>exposure             | Fever<br>Rash | HT | Peak<br>sCr | eGFR | RIFLE   | RRT | P <sub>u</sub> /C <sub>u</sub> | Hu | Lu | Etiology                                     | Other biopsy findings           | Treatment        | Renal function at<br>Last Follow-up (M <sub>u</sub> ) |
|-------------------------------------------------|---------------|------|--------------|---------------------|------|-----------------------------|---------------|----|-------------|------|---------|-----|--------------------------------|----|----|----------------------------------------------|---------------------------------|------------------|-------------------------------------------------------|
| <b>GRANULOMATOUS INTERSTITIAL NEPHRITIS</b>     |               |      |              |                     |      |                             |               |    |             |      |         |     |                                |    |    |                                              |                                 |                  |                                                       |
| 1                                               | 54/F          | B    | 110          | 2.7x10 <sup>4</sup> | +    | -                           | +/-           | -  | 5,69        | 9    | AKI     | -   | 3182                           | +  | -  | Opportunistic Infection<br>(disseminated TB) | caseous necrosis<br>Tubulopathy | ATB + Steroids   | Death (<M1)                                           |
| 2                                               | 53/M          | C    | 50           | <40                 | +    | IDV/D4T/3TC                 | -/-           | -  | 5.92        | 11   | AKI/CKD | -   | 1502                           | +  | -  | Opportunistic Infection<br>(AMI)             | TA                              | ATB + Steroids   | NA                                                    |
| 3                                               | 42/M          | C    | 73           | <40                 | +    | 3TC/AZT/RTV/<br>FOS-APV     | -/-           | -  | 2.86        | 24   | AKI/CKD | -   | 981                            | -  | -  | Opportunistic Infection<br>(AMI)             | Tubulitis, TA                   | ATB + Steroids   | CR<br>(0.79 mg/dl, M52)                               |
| 4                                               | 32/M          | C    | 74           | <40                 | +    | TDF/RAL/T-20/<br>ABC/3TC    | -/-           | -  | 3.2         | 23   | AKI     | -   | 5471                           | -  | NA | Opportunistic Infection<br>(AMI)             | Tubulitis, ATN                  | ATB + Steroids   | PR-CKD<br>(1.74 mg/dl, M15)                           |
| 5                                               | 47/M          | C    | 354          | 6.4x10 <sup>4</sup> | -    | -                           | -/-           | -  | 1.73        | 43   | AKI     | -   | 442                            | -  | -  | Undetermined                                 | Tubulitis, TA<br>IgAN           | HAART initiation | CR<br>(1.07 mg/dl, M54)                               |
| 6                                               | 67/M          | C    | 282          | <40                 | +    | 3TC/NFV/NVP                 | -/-           | -  | 2.85        | 22   | AKI/CKD | -   | 442                            | -  | -  | Undetermined                                 | TA                              | ATB + Steroids   | PR-CKD<br>(1.98 mg/dl, M1)                            |
| <b>NON GRANULOMATOUS INTERSTITIAL NEPHRITIS</b> |               |      |              |                     |      |                             |               |    |             |      |         |     |                                |    |    |                                              |                                 |                  |                                                       |
| 7*                                              | 51/M          | C    | NA           | NA                  | +    | NA                          | -/-           | NA | NA          | <60  | AKI     | -   | NA                             | NA | NA | Drug (FOS)                                   | Crystal nephropathy             | Drug withdrawal  | NA                                                    |
| 8*                                              | 35/M          | C    | NA           | NA                  | +    | NA                          | -/-           | NA | 5.65        | 12   | AKI     | -   | 2210                           | NA | NA | Drug (FOS)                                   | Crystal nephropathy             | Drug withdrawal  | NA                                                    |
| 9*                                              | 33/F          | C    | 113          | 1200                | -    | IDV/AZT/3TC                 | -/-           | NA | 2.06        | 29   | AKI     | -   | <442                           | +  | +  | Drug (IDN)                                   | Crystal nephropathy             | Drug withdrawal  | PR-CKD                                                |
| 10                                              | 37/M          | C    | 214          | <40                 | -    | IDV/AZT/3TC                 | -/-           | NA | 2.24        | 35   | AKI     | -   | +                              | +  | +  | Drug (IDN)                                   | Crystal nephropathy             | Drug withdrawal  | PR-CKD                                                |
| 11                                              | 44/M          | B    | NA           | NA                  | +    | RTV/DRV/ABC/<br>3TC         | -/-           | -  | 0.84        | 121  | NRF     | -   | 2545                           | -  | NA | Drug (ABC)                                   | Tubulopathy                     | Drug withdrawal  | NRF<br>(M21)                                          |
| 12                                              | 48/M          | B    | 711          | 7000                | -    | DDI/NFV/AZT                 | -/-           | NA | 1182        | 5    | AKF/CKD | +   | 1768                           | +  | +  | Drug (NSAIDs)                                | Interstitial hemorrhage         | Drug withdrawal  | PR-CKD<br>(3.39 mg/dl, M½)                            |
| 13                                              | 56/M          | C    | NA           | NA                  | -    | TDF/RTN/RTV/<br>/LOP/EFV    | -/-           | -  | 13.37       | 6    | AKF     | +   | 2210                           | -  | -  | Drug (NSAIDs)                                | ATN                             | Drug withdrawal  | CR<br>(1.11 mg/dl, M2)                                |
| 14                                              | 45/M          | B    | 52           | 1.8x10 <sup>5</sup> | +    | -                           | -/-           | +  | 1.40        | 66   | AKI     | -   | 786                            | +  | -  | Drug (TMP/SMZ)                               | -                               | Drug withdrawal  | CR<br>(0.98 mg/dl, M10)                               |
| 15                                              | 57/M          | H    | 974          | <40                 | +    | 3TC/EFV/RTV/<br>LPV/IDV     | -/-           | -  | 2.53        | 26   | CKD     | -   | 1334                           | +  | +  | Dysimmune (DILS)                             | Tubulitis, Tubulopathy          | None             | Stable-CKD<br>(2.46mg/dl, M36)                        |
| 16                                              | 42/M          | C    | 455          | <40                 | +    | TDF/EMT/RTV/<br>LPV/ABC/3TC | -/-           | -  | 4.88        | 13   | AKI/CKD | -   | 671                            | -  | NA | Dysimmune (DILS)                             | TA<br>mild NAS                  | Steroids         | PR-CKD<br>(3.30 mg/dl, M2)                            |
| 17                                              | 29/M          | B    | NA           | 1.5x10 <sup>4</sup> | +    | EFV/ABC/3TC/<br>RTV/LPV     | +/-           | -  | 2.08        | 46   | AKI     | -   | <442                           | -  | -  | Dysimmune (DILS)                             | Tubulitis                       | Steroids         | CR<br>(1.02 mg/dl, M8)                                |
| 18                                              | 30/F          | B    | 26           | 5.7x10 <sup>4</sup> | +    | HAART                       | +/-           | -  | 1.62        | 45   | AKI     | -   | 733                            | -  | -  | Dysimmune (IRIS)/TB                          | TA                              | ATB + Steroids   | CR<br>(0.85 mg/dl, M12)                               |
| 19                                              | 49/M          | B    | 6            | 3.9x10 <sup>5</sup> | +    | HAART<br>Including TDF      | +/-           | -  | 2.49        | 34   | AKI     | -   | 2917                           | NA | NA | Dysimmune (IRIS)/TB                          | Tubulitis, TA                   | ATB + Steroids   | CR<br>(1.06 mg/dl, M68)                               |

|         |      |   |     |                   |   |                         |     |    |       |     |      |   |      |   |    |                                      |                              |                  |                                    |
|---------|------|---|-----|-------------------|---|-------------------------|-----|----|-------|-----|------|---|------|---|----|--------------------------------------|------------------------------|------------------|------------------------------------|
| 20      | 54/M | H | NA  | 94                | + | FOZ/RTV/ABC/3TC         | -/- | -  | 1.85  | 38  | AKI  | - | <442 | - | NA | Multicentric CD                      | mild to moderate NAS         | Chemotherapy     | CR<br>(1.12 mg/dl, M10)            |
| 21      | 50/M | C | 750 | <40               | - | ABC/3TC/RTV/SQV         | -/- | +  | 13.80 | 4   | AKF  | + | 530  | + | +  | Hantavirus infection                 | medullary hemorrhage         | NA               | CR<br>(1.13mg/dl, M15)             |
| 22      | 51/M | C | 175 | NA                | - | -                       | +/- | -  | 6.04  | 11  | AKF  | - | <442 | + | -  | Undetermined                         | MN                           | HAART initiation | CR<br>(1.10 mg/dl, M156)           |
| 23      | 40/F | C | 196 | 170               | - | TDF/3TC/RTV/LPV         | -/- | -  | 2.73  | 19  | AKF  | - | 6541 | - | -  | Undetermined                         | Tubulitis, Tubulopathy<br>MN | NA               | CR<br>(0.94mg/dl, M7)              |
| 24      | 33/F | B | 293 | 4x10 <sup>4</sup> | - | HAARTincluding ABC      | +/- | +  | 0.57  | 146 | NRF  | - | 760  | - | -  | Undetermined                         | Tubulitis                    | NA               | NA                                 |
| 25      | 46/M | A | 712 | <40               | + | 3TC/D4T/NVP             | -/- | NA | 1.29  | 60  | Risk | - | <442 | + | -  | A/CTIN<br>(recurrent IDN lithiasis?) | TA<br>IgAN                   | None             | CR<br>(1.10 mg/dl, M12)            |
| 26      | 48/M | B | 546 | <40               | - | TDF/ATZ/RAL/RTV/ABC/3TC | -/- | +  | 1.82  | 42  | Risk | - | 1493 | - | -  | A/CTIN<br>(Toxicity of TDF?)         | mild to moderate NAS         | None             | Stable-CKD<br>(1.83 mg/dl, M28)    |
| 27      | 40/M | C | NA  | <40               | - | TDF/ATZ/RTV/LPV         | -/- | -  | 1.05  | 83  | NRF  | - | 1644 | - | NA | CTIN                                 | -                            | None             | NA                                 |
| 28      | 55/F | C | 182 | 4816              | - | RTV/LPV/AZT/3TC         | -/- | +  | 1.03  | 59  | Risk | - | 1617 | - | NA | CTIN<br>(history of ATN )            | -                            | None             | CR<br>(0.80 mg/dl, M14)            |
| 29      | 33/F | B | 450 | <40               | - | TDF/ABC/LPV             | -/- | -  | 1.48  | 49  | AKI  | - | 3182 | + | +  | CTIN                                 | Tubulopathy                  | None             | Worsening-CKD<br>(1.83 mg/dl, M31) |
| 30<br>* | 38/M | C | NA  | NA                | + | NA                      | -/- | +  | 3.03  | 25  | Risk | - | 1326 | - | +  | CTIN<br>(Toxicity of FOS?)           | TA                           | None             | NA                                 |

\* Renal biopsy performed before 1997.

HAART, highly active antiretroviral therapy with no more precision; NA, not available; M, male; F, female; B, Black; H, Hispanic; C, Caucasian; A, Asian; VL (copies/mL), viral load; AIDS, acquired immunodeficiency syndrome; ARV, antiretroviral; TDF, tenofovir; DRV, darunavir; RTV, ritonavir; ATZ, atazanavir; ddI, didanosine; 3TC, lamivudine; LPV, lopinavir; ABC, abacavir; EFV, efavirenz; SQV, saquinavir; IDV, indinavir; FOS-APV, fosamprenavir; d4T, stavudine; AZT, zidovudine; NFV, nelfinavir; RAL, raltegravir; FTC, emtricitabine; T-20, enfuvirtide; NVP, nevirapin; HTN, hypertension; sCr (mg/dl), serum Creatinine; eGFR (ml/min/1.73m<sup>2</sup>), estimated Glomerular Filtration Rate; AKI, acute kidney injury; AKF, acute kidney failure; CKD, chronic kidney disease; RRT, renal replacement therapy; P<sub>u</sub>/C<sub>u</sub> (mg/g), proteinuria-to-creatinuria ratio; Hu, hematuria; Lu, leukocyturia; TB, tuberculosis; AML, atypical mycobacterial infection; FOS, foscarnet; NSAIDS, non-steroidal anti-inflammatory drugs; DILS, diffuse infiltrative lymphocytosis syndrome; IRIS, immune reconstitution inflammatory syndrome; CD, Castleman disease; A/CTIN, acute-on-chronic tubulointerstitial nephritis; CTIN, chronic tubulointerstitial nephritis; TA, tubular atrophy; ATN, acute tubular necrosis; IgAN, IgA nephropathy; NAS, nephroangiosclerosis; MN, membranous nephropathy; CR, complete recovery; PR, partial recovery; M<sub>x</sub>, month x
